# Supplementary material
Source: MDPI journal article supplement (https://www.mdpi.com/1999-4907/14/2/355)
Supplement: s1 [file s1]

## Supplementary material

**Table S1** Dominant species in karst and non-karst forests.

| County    | Soil type | Altitude (m) | Dominant species                                                                                                                                                                                      |
|-----------|-----------|--------------|-------------------------------------------------------------------------------------------------------------------------------------------------------------------------------------------------------|
| Shuicheng | Non-Karst | 1847–2199    | <i>Quercus</i> (L.); <i>Pistacia chinensis</i> (B.); <i>Pinus massoniana</i> (Lamb.); <i>Castanea mollissima</i> (Bl.); <i>Schefflera heptaphylla</i> (Linn.) Frodin                                  |
|           | Karst     | 2001–2146    | <i>Ulmus pumila</i> (L.); <i>Quercus variabilis</i> (Bl.); <i>Platycarya longipes</i> (W.); <i>Cyclobalanopsis glauca</i> (T.) Oerst.                                                                 |
| Jinsha    | Non-Karst | 1024–1163    | <i>Populus lasiocarpa</i> Oliv.; <i>Quercus</i> (L.); <i>Pinus massoniana</i> (Lamb.); <i>Camellia brevistyla</i> (Heyata) Coh. St.; <i>Erythrophleum fordii</i> Oliv.; <i>Cyclobalanopsis glauca</i> |
|           | Karst     | 1030–1041    | <i>Celtis biondii</i> (Pamp.); <i>Cyclobalanopsis glauca</i> (T.) Oerst; <i>Cupressus funebris</i> (Endl.); <i>Lindera communis</i> Hemsl.                                                            |
| Duyun     | Non-Karst | 1182–1207    | <i>Quercus</i> (L.); <i>Pistacia chinensis</i> (B.); <i>Pittosporum tonkinense</i> Gagnep.; <i>Rhododendron championae</i> Hook.                                                                      |
|           | Karst     | 1035–1077    | <i>Cyclobalanopsis glauca</i> (T.) Oerst; <i>Cinnamomum bodinieri</i> Levl; <i>Cinnamomum tamala</i> (Ham.);                                                                                          |
| Huanjiang | Non-Karst | 237–314      | <i>Castanopsis hystrix</i> Miq.; <i>Pittosporum tonkinense</i> Gagnep.; <i>Cinnamomum bodinieri</i> Levl.; <i>Liquidambar formosana</i> Hance                                                         |
|           | Karst     | 349–496      | <i>Cinnamomum tamala</i> (Ham.); <i>Cipadessa baccifera</i> (Roth.) Miq.; <i>Rapanea neriifolia</i> Mez.; <i>Liquidambar formosana</i> Hance; <i>Paulownia fortunei</i> (Seem.) Hemsl.                |
| Duan      | Non-Karst | 170–189      | <i>Pinus massoniana</i> Lamb.; <i>Camellia brevistyla</i> (Heyata) Coh. St.; <i>Liquidambar formosana</i> Hance; <i>Maesa japonica</i> (Thunb.) Moritzi.; <i>Ficus fistulosa</i> Reinw. ex Bl.        |

|          |           |         |                                                                                                                                                                                                                     |
|----------|-----------|---------|---------------------------------------------------------------------------------------------------------------------------------------------------------------------------------------------------------------------|
|          | Karst     | 293–606 | <i>Cyclobalanopsis glauca</i> (T.) Oerst; <i>Acer oblongum</i> Wall.; <i>Phaseolus vulgaris</i> Linn.; <i>Ulmus pumila</i> (L.); <i>Koelreuteria paniculata</i> Laxm.                                               |
| Mashan   | Non-Karst | 231–255 | <i>Pinus massoniana</i> Lamb.; <i>Cinnamomum bodinieri</i> Levl.; <i>Pittosporum tonkinense</i> Gagnep.; <i>Evodia leptota</i> (Spreng.) Merr.                                                                      |
|          | Karst     | 558–628 | <i>Castanopsis hystrix</i> Miq.; <i>Pittosporum tonkinense</i> Gagnep.; <i>Platycarya longipes</i> Wu; <i>Cinnamomum bodinieri</i> Levl.                                                                            |
| Longzhou | Non-Karst | 179–233 | <i>Cryptomeria japonica</i> (Thunb. ex L. f.) D. Don; <i>Liquidambar formosana</i> Hance; <i>Psychotria rubra</i> (Lour.) Poir; <i>Schefflera heptaphylla</i> (Linn.) Frodin; <i>Ehretia acuminata</i> (DC.) R. Br. |
|          | Karst     | 197–436 | <i>Castanopsis hystrix</i> Miq.; <i>Ostrya japonica</i> Sarg.; <i>Ficus microcarpa</i> Linn.                                                                                                                        |
